# Supplementary material for: Every photon counts: understanding and optimizing photon paths in luminescent solar concentrator-based photomicroreactors (LSC-PMs)
Source: Royal Society of Chemistry journal article supplement (doi:10.1039/c7re00077d), 2017-01-01
Supplement: c7re00077d1.pdf [file c7re00077d1.pdf]

1

2

3 Supporting Information

4

5

6 **Every Photon Counts: Understanding and Optimizing Photon Paths in Luminescent Solar**

7 **Concentrator-based Photomicroreactors (LSC-PMs)**

8

9 *Dario Cambié, Fang Zhao, Volker Hessel, Michael G. Debijs\*, Timothy Noël\**

## 1 LSC-PM Manufacturing

2 The LSC-PM devices were produced as previously reported.<sup>[1]</sup>

3 Two slabs of Lumogen F Red 305 (LR305)-doped PDMS (Dow Corning Sylgard 184, ratio 10:1 base:curing  
4 agent) were bonded together after an oxygen plasma treatment (1 min, 30W): a 2 mm thick layer with the  
5 reaction channel profile and a flat slab of 1 mm thickness as cover. The channel layer is obtained by casting  
6 PDMS in a 3D-printed mold (printed with a Felixprinters Felix Pro 2) with the positive relief of the channel  
7 design, while the cover layer was the result of the PDMS casting in a Petri dish. A schematic overview of the  
8 complete process is presented in Figure S1. The resulting channel have a rectangular cross-section and are  
9 0.5 mm width and 1mm tall (see Figure S2).

10

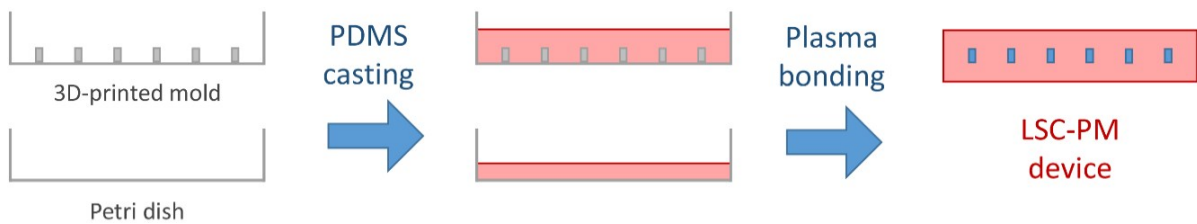

11

12 *Figure S1. LSC-PM device process overview. First, LR305-doped PDMS is cast in a Petri dish modified with the 3D-printed mold.*

13 *Then, the polymer is thermally cured and the two pieces are bonded with plasma oxygen, resulting in the final device.*

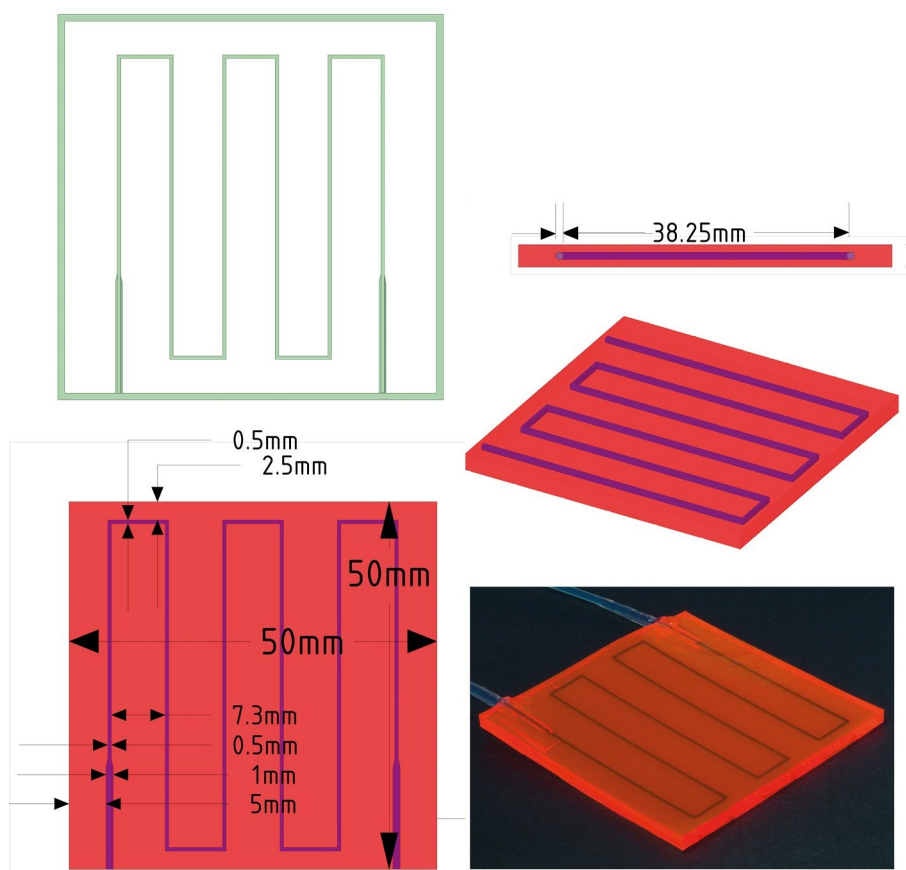

1  
2 *Figure S2 Designs and photograph of the LSC-PM.*

### 3 Model validation

#### 4 Source code

5 The source-code of the python scripts used for the simulation is freely available on Git-hub  
6 (<https://github.com/dcambie/pvtrace>).

7 Simulations were run with “/pvtrace/scripts/LSC-PM/run\_simulation.py”, while to calculate the APPTDs,  
8 the “/pvtrace/scripts/LSC-PM/analyse\_simulation.py” script was used. For all the simulations in the model  
9 validation section the “5x5\_6ch\_squared” model reactor was used, that was designed to match the  
10 experimental design. The channel geometry of all the simulated reactor can be found in the relevant file in  
11 “/pvtrace/data/reactors/”.

12 The model assumes a quantum yield for Red 305 in PDMS of 0.95 and an AM 1.5G solar spectrum  
13 irradiating with normal incidence the top surface of the LSC-PM. The luminophore particles are assumed to  
14 be homogenously dispersed throughout the LSC-PM; thus, the absorption spectrum is constant throughout  
15 the device. The refractive index of the lightguide is based on that of PDMS and is assumed constant in the  
16 range of wavelengths considered (350-700 nm). The quantum yield of the dye is assumed constant  
17 regardless the incident photon intensity and the luminescent emission is isotropic. For the reaction  
18 channels, methylene blue (the photocatalyst) is assumed to be the only absorbing species in solution.  
19 Scattering effects are not considered in simulations.

1 All simulations were performed with 100k photons as this quantity offers a good tradeoff between accuracy  
 2 and computation time. While the duration of the simulation depends on factors like the dye doping, the  
 3 number of elements included in the scene and the average number of steps for photon, a typical simulation  
 4 of a 5x5cm device with a 200ppm LR305 doping took about 1 hour (with in-memory database). It is well  
 5 known that, due to the stochastic nature of Monte Carlo simulations, the standard deviation of the results  
 6 decreases with the square root of the number of repetitions. This trend was observed also in our case, as  
 7 highlight by the exponential trend (close to  $x^{-0.5}$ ) in Figure S3, where the same simulation was repeated 5  
 8 times with different number of photons to estimate the error associated with each photon fate at different  
 9 photon-counts. Intuitively, the photon fate with less evaluation steps and with higher photon fraction (e.g.  
 10 Solar photons transmitted at the bottom) are characterized by lower errors.

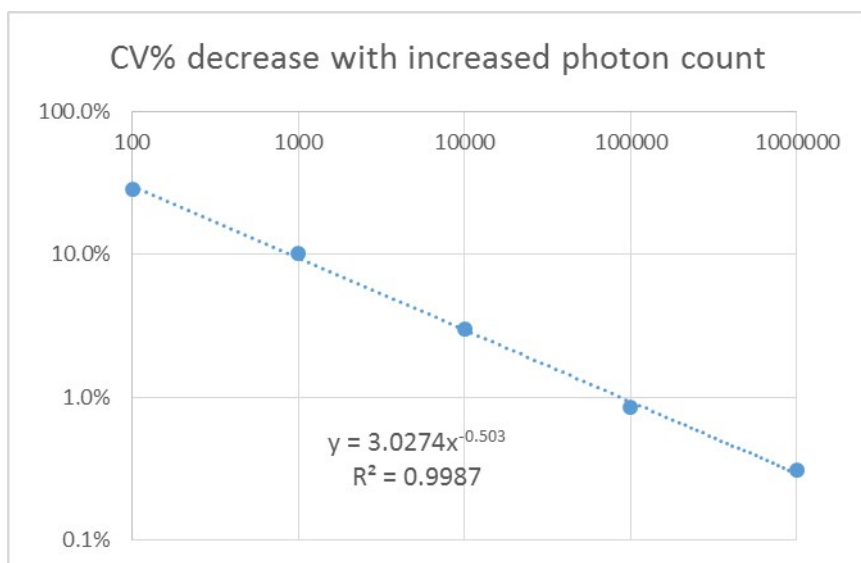

11  
 12 *Figure S3 Decreasing error with the increased photon number per simulation.*

| Photon count | Total photons | Losses | Luminescent |           | Solar |        | Channels |             | Average |
|--------------|---------------|--------|-------------|-----------|-------|--------|----------|-------------|---------|
|              |               |        | Edges       | Apertures | Top   | Bottom | Direct   | Luminescent |         |
| 100          | 0.0%          | 39.9%  | 63.2%       | 20.9%     | 44.5% | 1.9%   | 44.5%    | 15.3%       | 28.8%   |
| 1k           | 0.1%          | 17.1%  | 15.8%       | 11.8%     | 8.2%  | 3.3%   | 18.4%    | 6.5%        | 10.2%   |
| 10k          | 0.0%          | 4.4%   | 4.8%        | 3.0%      | 2.6%  | 0.9%   | 3.9%     | 4.1%        | 3.0%    |
| 100k         | 0.0%          | 0.9%   | 1.9%        | 0.8%      | 0.9%  | 0.3%   | 1.7%     | 0.3%        | 0.8%    |
| 1M           | 0.0%          | 0.2%   | 0.3%        | 0.2%      | 0.7%  | 0.1%   | 0.9%     | 0.1%        | 0.3%    |

13  
 14 **Reflections**  
 15 **Experimental**  
 16 For the measurement of the reflectance, a Perkin Elmer Lambda 750 UV-VIS-NIR spectrophotometer with a  
 17 Universal Reflectance Accessory was used. In particular, the device was irradiated with an angle of  
 18 incidence of 15° and the reflection was measured at 30°. The angular distribution of the reflected beam and  
 19 its spectral distribution (evidencing the luminophore absorption) are reported in Figure S4.

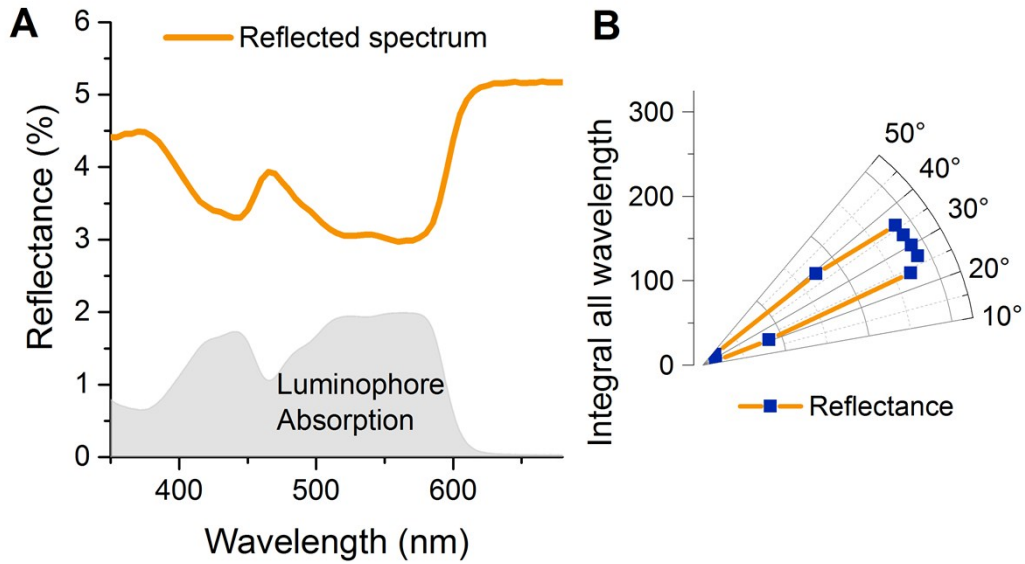

1  
 2 *Figure S4 A Spectral distribution of a high-doping LSC-PM showing the impact of the luminophore absorption in the bottom*  
 3 *reflected photons. B Angular distribution of the light reflected by the LSC-PM.*

4 **Simulation**

5 In normal conditions, the model printout does not allow to split the contribution from first and second  
 6 surfaces reflections. To measure the number of photons reflected by the top surface, the following query  
 7 was executed on the photon database at the end of the simulation:

```
8 SELECT MAX(uid) FROM photon GROUP BY pid HAVING uid IN (SELECT uid FROM state
9 WHERE ray_direction_bound = "Out" AND surface_id='top' AND intersection_counter = 1
10 GROUP BY uid);
```

11 The expected reflectance for normal irradiation of PDMS ( $n=1.41$ ) according to Fresnel equations would be:

12 
$$R = \left( \frac{n - 1}{n + 1} \right)^2$$

13 
$$R = \left( \frac{n_{\text{PDMS}} - n_{\text{air}}}{n_{\text{PDMS}} + n_{\text{air}}} \right)^2 = \left( \frac{1.41 - 1}{1.41 + 1} \right)^2 = 2.91$$

14 The raw results of the simulation are the following:

| LR305 doping (ppm) | Total photons | Losses | Luminescent |           | Solar |        | Channels |             | Top Reflections | Reflections |      |        |
|--------------------|---------------|--------|-------------|-----------|-------|--------|----------|-------------|-----------------|-------------|------|--------|
|                    |               |        | Edges       | Apertures | Top   | Bottom | Direct   | Luminescent |                 | Total       | Top  | Bottom |
| 0                  | 100000        | 308    | 0           | 0         | 5628  | 90303  | 3761     | 0           | 2956            | 5.6%        | 3.0% | 2.7%   |
| 10                 | 99997         | 846    | 1860        | 1988      | 5278  | 83945  | 3650     | 2430        | 2992            | 5.3%        | 3.0% | 2.3%   |
| 20                 | 99993         | 1310   | 3157        | 3899      | 4843  | 78689  | 3503     | 4593        | 2852            | 4.8%        | 2.9% | 2.0%   |
| 30                 | 100000        | 1657   | 4351        | 5667      | 4786  | 73854  | 3361     | 6324        | 3005            | 4.8%        | 3.0% | 1.8%   |
| 40                 | 99993         | 2011   | 5396        | 7045      | 4696  | 69491  | 3387     | 7968        | 2964            | 4.7%        | 3.0% | 1.7%   |
| 50                 | 99989         | 2385   | 6011        | 8370      | 4547  | 66221  | 3390     | 9065        | 2899            | 4.5%        | 2.9% | 1.6%   |
| 60                 | 99989         | 2697   | 6645        | 9335      | 4358  | 63431  | 3303     | 10221       | 2939            | 4.4%        | 2.9% | 1.4%   |
| 70                 | 99991         | 2930   | 7336        | 10287     | 4276  | 60808  | 3202     | 11153       | 2863            | 4.3%        | 2.9% | 1.4%   |
| 80                 | 99987         | 3193   | 7734        | 11404     | 4232  | 58221  | 3193     | 12011       | 2897            | 4.2%        | 2.9% | 1.3%   |
| 90                 | 99989         | 3424   | 8228        | 11829     | 4359  | 56272  | 3153     | 12725       | 2994            | 4.4%        | 3.0% | 1.4%   |

| LR305 doping (ppm) | Total photons | Losses | Luminescent |           | Solar |        | Channels |             | Top         | Reflections |      |        |
|--------------------|---------------|--------|-------------|-----------|-------|--------|----------|-------------|-------------|-------------|------|--------|
|                    |               |        | Edges       | Apertures | Top   | Bottom | Direct   | Luminescent | Reflections | Total       | Top  | Bottom |
| 100                | 99989         | 3555   | 8554        | 12817     | 4038  | 54503  | 3008     | 13514       | 2870        | 4.0%        | 2.9% | 1.2%   |
| 110                | 99986         | 3736   | 9181        | 13197     | 4067  | 52870  | 3085     | 13851       | 2897        | 4.1%        | 2.9% | 1.2%   |
| 120                | 99991         | 3880   | 9382        | 13875     | 4010  | 51489  | 2967     | 14388       | 2845        | 4.0%        | 2.8% | 1.2%   |
| 130                | 99988         | 4214   | 9831        | 14481     | 4069  | 49532  | 2972     | 14889       | 2903        | 4.1%        | 2.9% | 1.2%   |
| 140                | 99988         | 4227   | 9781        | 15053     | 3933  | 48640  | 2964     | 15390       | 2850        | 3.9%        | 2.9% | 1.1%   |
| 150                | 99986         | 4415   | 10232       | 15253     | 4086  | 47330  | 2963     | 15708       | 2961        | 4.1%        | 3.0% | 1.1%   |
| 160                | 99983         | 4313   | 10440       | 15659     | 4073  | 46609  | 2859     | 16032       | 3014        | 4.1%        | 3.0% | 1.1%   |
| 170                | 99990         | 4583   | 10554       | 16174     | 3997  | 45463  | 2880     | 16340       | 2859        | 4.0%        | 2.9% | 1.1%   |
| 180                | 99989         | 4671   | 10583       | 16391     | 4019  | 44715  | 2847     | 16763       | 2947        | 4.0%        | 2.9% | 1.1%   |
| 190                | 99988         | 4765   | 10818       | 16728     | 3894  | 44076  | 2802     | 16906       | 2841        | 3.9%        | 2.8% | 1.1%   |
| 200                | 99989         | 4768   | 11068       | 17214     | 3871  | 43276  | 2741     | 17051       | 2865        | 3.9%        | 2.9% | 1.0%   |
| 210                | 99985         | 5060   | 11127       | 17293     | 3937  | 42677  | 2750     | 17141       | 2932        | 3.9%        | 2.9% | 1.0%   |
| 220                | 99978         | 5129   | 11129       | 17517     | 3920  | 41948  | 2647     | 17691       | 2891        | 3.9%        | 2.9% | 1.0%   |
| 230                | 99984         | 5047   | 11434       | 17795     | 3880  | 41424  | 2592     | 17812       | 2865        | 3.9%        | 2.9% | 1.0%   |
| 240                | 99986         | 5233   | 11641       | 17876     | 3963  | 40581  | 2720     | 17972       | 2943        | 4.0%        | 2.9% | 1.0%   |
| 250                | 99988         | 5230   | 11527       | 18210     | 3917  | 40241  | 2659     | 18204       | 2944        | 3.9%        | 2.9% | 1.0%   |

1

## 2 Transmission

### 3 Experimental

4 The transmission spectra were measured by irradiating 5x5cm LSC-PM placed on the opening of an  
5 integrating sphere (Labsphere, Inc. LMS 1050) with solar simulated light (LS0110-100, L.O.T.-Oriol GmbH &  
6 Co.) reflected from a prism. In figure Figure S5 the transmission spectra of the different devices. Both the  
7 dye absorption and the bottom emission are clearly visible.

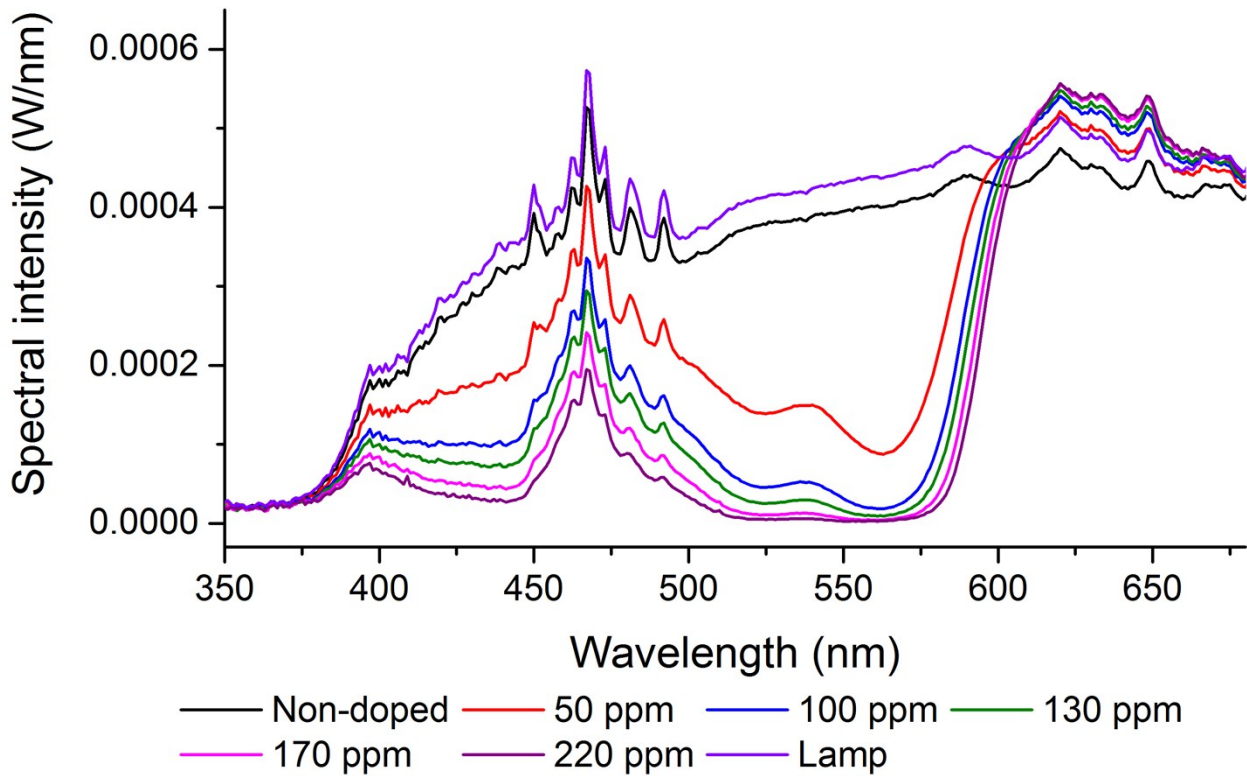

1

2 *Figure S5 Transmission spectra of LSC-PMs with different dye doping. It's notable the decrease in transmission due to the dye*  
 3 *absorption in the 400-600 nm range and the increase due to luminescent photons leaving the device from the bottom aperture*  
 4 *at wavelengths longer than 600 nm.*

5 **Simulation**

6 For the transmission spectra simulation, the 5x5cm reactor was modelled considering air in the channel  
 7 (refractive index=0). This allows the accurate simulation of the luminescent photons emitted out of the  
 8 escape cone.

9 The raw results of the simulation are the following:

| LR305 doping (ppm) | Total photons | Losses | Luminescent |      |        | Solar |        | Transmission |             |       |
|--------------------|---------------|--------|-------------|------|--------|-------|--------|--------------|-------------|-------|
|                    |               |        | Edges       | Top  | Bottom | Top   | Bottom | Total        | Luminescent | Solar |
| 0                  | 100000        | 303    | 0           | 0    | 0      | 6020  | 93677  | 93.7%        | 0.0%        | 93.7% |
| 10                 | 99560         | 1033   | 3007        | 1365 | 1379   | 5737  | 87039  | 88.8%        | 1.4%        | 87.4% |
| 20                 | 99324         | 1536   | 5246        | 2722 | 2727   | 5474  | 81619  | 84.9%        | 2.7%        | 82.2% |
| 30                 | 99112         | 2172   | 7233        | 3760 | 3863   | 5187  | 76897  | 81.5%        | 3.9%        | 77.6% |
| 40                 | 98855         | 2613   | 8966        | 4945 | 4729   | 4999  | 72603  | 78.2%        | 4.8%        | 73.4% |
| 50                 | 98748         | 2960   | 10427       | 5661 | 5659   | 4925  | 69116  | 75.7%        | 5.7%        | 70.0% |
| 60                 | 98551         | 3448   | 11674       | 6320 | 6499   | 4835  | 65775  | 73.3%        | 6.6%        | 66.7% |
| 70                 | 98535         | 3626   | 12753       | 7116 | 7165   | 4640  | 63235  | 71.4%        | 7.3%        | 64.2% |
| 80                 | 98421         | 3903   | 13624       | 7743 | 7574   | 4571  | 61006  | 69.7%        | 7.7%        | 62.0% |
| 90                 | 98299         | 4289   | 14538       | 8135 | 8120   | 4521  | 58696  | 68.0%        | 8.3%        | 59.7% |
| 100                | 98205         | 4451   | 14915       | 8705 | 8583   | 4598  | 56953  | 66.7%        | 8.7%        | 58.0% |
| 110                | 98128         | 4595   | 15614       | 9292 | 8917   | 4376  | 55334  | 65.5%        | 9.1%        | 56.4% |
| 120                | 98087         | 4990   | 16080       | 9611 | 9287   | 4567  | 53552  | 64.1%        | 9.5%        | 54.6% |

| LR305 doping (ppm) | Total photons | Losses | Luminescent |       |        | Solar |        | Transmission |             |       |
|--------------------|---------------|--------|-------------|-------|--------|-------|--------|--------------|-------------|-------|
|                    |               |        | Edges       | Top   | Bottom | Top   | Bottom | Total        | Luminescent | Solar |
| 130                | 98050         | 5071   | 16872       | 9968  | 9573   | 4387  | 52179  | 63.0%        | 9.8%        | 53.2% |
| 140                | 97929         | 5424   | 17201       | 10322 | 9859   | 4247  | 50876  | 62.0%        | 10.1%       | 52.0% |
| 150                | 97838         | 5586   | 17645       | 10442 | 10233  | 4257  | 49675  | 61.2%        | 10.5%       | 50.8% |
| 160                | 97875         | 5675   | 18051       | 10959 | 10172  | 4275  | 48743  | 60.2%        | 10.4%       | 49.8% |
| 170                | 97759         | 5746   | 18361       | 11145 | 10510  | 4267  | 47730  | 59.6%        | 10.8%       | 48.8% |
| 180                | 97779         | 5836   | 18919       | 11234 | 10651  | 4242  | 46897  | 58.9%        | 10.9%       | 48.0% |
| 190                | 97746         | 5935   | 18869       | 11534 | 10941  | 4143  | 46324  | 58.6%        | 11.2%       | 47.4% |
| 200                | 97730         | 5894   | 19403       | 11799 | 11049  | 4163  | 45422  | 57.8%        | 11.3%       | 46.5% |
| 210                | 97638         | 6149   | 19321       | 12018 | 11236  | 4170  | 44744  | 57.3%        | 11.5%       | 45.8% |
| 220                | 97659         | 6132   | 19775       | 12305 | 11220  | 4266  | 43961  | 56.5%        | 11.5%       | 45.0% |
| 230                | 97526         | 6401   | 19590       | 12452 | 11557  | 4066  | 43460  | 56.4%        | 11.9%       | 44.6% |
| 240                | 97495         | 6591   | 19856       | 12525 | 11556  | 4065  | 42902  | 55.9%        | 11.9%       | 44.0% |
| 250                | 97594         | 6569   | 20257       | 12565 | 11722  | 4113  | 42368  | 55.4%        | 12.0%       | 43.4% |

1

## 2 Edge emissions

### 3 Experimental

4 For the edge emission measurement, a 300 W solar simulator (LS0110-100, L.O.T.-Oriol GmbH & Co.)  
5 equipped with filters to approximate the 1.5 air mass solar spectrum (AM 1.5), and a 10 in integrating  
6 sphere (Labsphere, Inc. LMS 1050) coupled with a diode array detector (RPS900, International Light) with a  
7 sample holder matching the device sizes (5×5×0.3 cm<sup>3</sup>) were utilized.

### 8 Simulation

9 For the simulations with methylene blue (MB) in the channels (Figure 4B in the manuscript), increasing  
10 concentration of MB in acetonitrile were simulated in 50, 100 and 200 ppm LSC-PM.

11 The raw results of the simulation **for the 50 ppm dye-doped** devices are the following:

| MB loading (M) | Total photons | Losses | Luminescent |           | Solar |        | Channels |             | Edge emissions |
|----------------|---------------|--------|-------------|-----------|-------|--------|----------|-------------|----------------|
|                |               |        | Edges       | Apertures | Top   | Bottom | Direct   | Luminescent |                |
| 1.00E-05       | 99514         | 2885   | 11301       | 10119     | 4544  | 68755  | 343      | 1572        | 11.4%          |
| 1.26E-05       | 99602         | 2828   | 11057       | 9967      | 4597  | 68784  | 441      | 1937        | 11.1%          |
| 1.58E-05       | 99693         | 2840   | 10717       | 9771      | 4654  | 68952  | 507      | 2259        | 10.8%          |
| 2.00E-05       | 99693         | 2772   | 10539       | 9665      | 4558  | 68802  | 643      | 2720        | 10.6%          |
| 2.51E-05       | 99748         | 2718   | 10295       | 9645      | 4420  | 68738  | 793      | 3146        | 10.3%          |
| 3.16E-05       | 99809         | 2669   | 9872        | 9569      | 4379  | 68818  | 940      | 3573        | 9.9%           |
| 3.98E-05       | 99871         | 2674   | 9296        | 9453      | 4554  | 68425  | 1136     | 4337        | 9.3%           |
| 5.01E-05       | 99901         | 2565   | 9139        | 9407      | 4502  | 68196  | 1296     | 4798        | 9.1%           |
| 6.31E-05       | 99934         | 2561   | 8656        | 9243      | 4449  | 67972  | 1588     | 5467        | 8.7%           |
| 7.94E-05       | 99953         | 2447   | 8277        | 8885      | 4618  | 67920  | 1767     | 6040        | 8.3%           |
| 1.00E-04       | 199908        | 5089   | 15768       | 17809     | 9126  | 134953 | 4083     | 13083       | 7.9%           |
| 1.26E-04       | 99975         | 2521   | 7351        | 8685      | 4495  | 67512  | 2286     | 7127        | 7.4%           |



| MB loading (M) | Total photons | Losses | Luminescent |           | Solar |        | Channels |             | Edge emissions |
|----------------|---------------|--------|-------------|-----------|-------|--------|----------|-------------|----------------|
|                |               |        | Edges       | Apertures | Top   | Bottom | Direct   | Luminescent |                |
| 1.58E-04       | 99983         | 2463   | 6891        | 8787      | 4520  | 67052  | 2545     | 7725        | 6.9%           |
| 2.00E-04       | 99986         | 2441   | 6784        | 8626      | 4409  | 67094  | 2675     | 7957        | 6.8%           |
| 2.51E-04       | 99993         | 2372   | 6303        | 8524      | 4422  | 67254  | 2854     | 8264        | 6.3%           |
| 3.16E-04       | 99994         | 2428   | 6247        | 8344      | 4527  | 66495  | 3184     | 8769        | 6.2%           |
| 3.98E-04       | 99995         | 2407   | 6036        | 8175      | 4433  | 66444  | 3348     | 9152        | 6.0%           |
| 5.01E-04       | 99998         | 2365   | 5926        | 8160      | 4392  | 66351  | 3553     | 9251        | 5.9%           |
| 6.31E-04       | 99987         | 2299   | 5889        | 8073      | 4374  | 66380  | 3657     | 9315        | 5.9%           |
| 7.94E-04       | 99993         | 2385   | 5658        | 8079      | 4450  | 65975  | 3913     | 9534        | 5.7%           |
| 1.00E-03       | 99992         | 2410   | 5633        | 8067      | 4531  | 65479  | 4174     | 9700        | 5.6%           |

1

2 The raw results of the simulation for the 100 ppm dye-doped devices are the following:

| MB loading (M) | Total photons | Losses | Luminescent |           | Solar |        | Channels |             | Edge emissions |
|----------------|---------------|--------|-------------|-----------|-------|--------|----------|-------------|----------------|
|                |               |        | Edges       | Apertures | Top   | Bottom | Direct   | Luminescent |                |
| 1.00E-05       | 99405         | 4334   | 16112       | 15338     | 4237  | 56647  | 342      | 2400        | 16.2%          |
| 1.26E-05       | 99453         | 4268   | 15788       | 15331     | 4100  | 56720  | 424      | 2829        | 15.9%          |
| 1.58E-05       | 99519         | 4186   | 15373       | 15163     | 4226  | 56634  | 537      | 3409        | 15.4%          |
| 2.00E-05       | 99637         | 4178   | 15122       | 15065     | 4238  | 56475  | 590      | 3971        | 15.2%          |
| 2.51E-05       | 99681         | 4166   | 14379       | 14930     | 4210  | 56456  | 782      | 4761        | 14.4%          |
| 3.16E-05       | 99754         | 4046   | 13889       | 14727     | 4241  | 56395  | 875      | 5585        | 13.9%          |
| 3.98E-05       | 99791         | 3970   | 13515       | 14498     | 4251  | 56154  | 1024     | 6386        | 13.5%          |
| 5.01E-05       | 99861         | 4017   | 13028       | 14379     | 4224  | 55690  | 1280     | 7247        | 13.0%          |
| 6.31E-05       | 99911         | 3809   | 12346       | 14108     | 4164  | 55813  | 1494     | 8178        | 12.4%          |
| 7.94E-05       | 99911         | 3877   | 11524       | 14021     | 4107  | 55635  | 1766     | 8985        | 11.5%          |
| 1.00E-04       | 99941         | 3881   | 11206       | 13624     | 4143  | 55385  | 1897     | 9810        | 11.2%          |
| 1.26E-04       | 99967         | 3890   | 10599       | 13772     | 4128  | 54843  | 2128     | 10608       | 10.6%          |
| 1.58E-04       | 99972         | 3851   | 10073       | 13135     | 4161  | 55060  | 2313     | 11379       | 10.1%          |
| 2.00E-04       | 99983         | 3735   | 9510        | 13238     | 4145  | 54867  | 2558     | 11932       | 9.5%           |
| 2.51E-04       | 99980         | 3612   | 9227        | 13043     | 4132  | 54891  | 2726     | 12349       | 9.2%           |
| 3.16E-04       | 99989         | 3685   | 8933        | 12741     | 4224  | 54498  | 3007     | 12901       | 8.9%           |
| 3.98E-04       | 99984         | 3512   | 8621        | 12858     | 4164  | 54385  | 3078     | 13367       | 8.6%           |
| 5.01E-04       | 99988         | 3505   | 8568        | 12685     | 4131  | 54264  | 3307     | 13528       | 8.6%           |
| 6.31E-04       | 99986         | 3564   | 8559        | 12248     | 4137  | 54124  | 3484     | 13871       | 8.6%           |
| 7.94E-04       | 99991         | 3649   | 8152        | 12377     | 4164  | 54322  | 3568     | 13760       | 8.2%           |
| 1.00E-03       | 99991         | 3628   | 8228        | 12546     | 4128  | 53685  | 3780     | 13997       | 8.2%           |

3

4 The raw results of the simulation for the 200 ppm dye-doped devices are the following:

| MB loading (M) | Total photons | Losses | Luminescent | Solar | Channels | Edge emissions |
|----------------|---------------|--------|-------------|-------|----------|----------------|
|----------------|---------------|--------|-------------|-------|----------|----------------|

|          |       |      | Edges | Apertures | Top  | Bottom | Direct | Luminescent |       |
|----------|-------|------|-------|-----------|------|--------|--------|-------------|-------|
| 1.00E-05 | 99204 | 5806 | 20376 | 20274     | 3985 | 45294  | 292    | 3182        | 20.5% |
| 1.26E-05 | 99278 | 5792 | 19781 | 20405     | 3954 | 45389  | 368    | 3595        | 19.9% |
| 1.58E-05 | 99445 | 5871 | 19650 | 20021     | 3939 | 45026  | 473    | 4474        | 19.8% |
| 2.00E-05 | 99506 | 5606 | 18861 | 20012     | 3967 | 45150  | 599    | 5322        | 19.0% |
| 2.51E-05 | 99596 | 5723 | 18462 | 19512     | 3974 | 44855  | 790    | 6285        | 18.5% |
| 3.16E-05 | 99697 | 5536 | 17817 | 19525     | 3976 | 44781  | 842    | 7229        | 17.9% |
| 3.98E-05 | 99773 | 5471 | 17164 | 19322     | 4007 | 44625  | 1013   | 8178        | 17.2% |
| 5.01E-05 | 99828 | 5367 | 16501 | 19125     | 3911 | 44337  | 1187   | 9406        | 16.5% |
| 6.31E-05 | 99871 | 5366 | 15348 | 18960     | 4017 | 44300  | 1398   | 10490       | 15.4% |
| 7.94E-05 | 99924 | 5419 | 14617 | 18496     | 3964 | 44188  | 1583   | 11663       | 14.6% |
| 1.00E-04 | 99941 | 5319 | 14077 | 18208     | 3940 | 43923  | 1734   | 12743       | 14.1% |
| 1.26E-04 | 99969 | 5040 | 13381 | 17876     | 3991 | 43983  | 1972   | 13727       | 13.4% |
| 1.58E-04 | 99959 | 5103 | 12788 | 18012     | 3992 | 43419  | 2151   | 14495       | 12.8% |
| 2.00E-04 | 99968 | 4997 | 12249 | 17684     | 3992 | 43464  | 2367   | 15216       | 12.3% |
| 2.51E-04 | 99966 | 5070 | 11701 | 17316     | 3952 | 43251  | 2516   | 16162       | 11.7% |
| 3.16E-04 | 99987 | 5002 | 11071 | 17299     | 3875 | 43243  | 2622   | 16875       | 11.1% |
| 3.98E-04 | 99984 | 4934 | 11078 | 17204     | 3944 | 43231  | 2723   | 16874       | 11.1% |
| 5.01E-04 | 99981 | 4920 | 10620 | 17021     | 3946 | 43180  | 2747   | 17548       | 10.6% |
| 6.31E-04 | 99988 | 4806 | 10486 | 16938     | 3911 | 43029  | 3035   | 17784       | 10.5% |
| 7.94E-04 | 99987 | 4836 | 10425 | 16737     | 3846 | 43156  | 3142   | 17845       | 10.4% |
| 1.00E-03 | 99994 | 4771 | 10525 | 16453     | 3955 | 42839  | 3295   | 18156       | 10.5% |

1

## 2 Model optimization

### 3 5x5 cm<sup>2</sup> LSC-PMs

4 Two 5x5 cm devices were modelled: the first one matching the experimental reactor (5x5\_6ch\_squared)  
5 and a second one where the thickness of the channels were set to match the total device thickness minus  
6 an infinitesimal quantity epsilon, to prevent errors in the handling of the 3D geometry by the simulation  
7 algorithm (5x5\_6ch\_squared\_fullthickness).

### 8 1x1 m<sup>2</sup> LSC-PMs

9 For the 1 square meter scaled-up devices the following reactor designs were used: "1sqm\_slab",  
10 "1sqm\_1dir\_10cm", "1sqm\_1dir\_5cm", "1sqm\_1dir\_2.5cm", "1sqm\_2dir\_10cm", "1sqm\_2dir\_5cm" and  
11 "1sqm\_2dir\_2.5cm".

12 The results of the simulations included in Figure 6 in the manuscript are reported below:

| Reactor design     | Total photons | Losses | Luminescent |           | Solar |        | Channels |             |
|--------------------|---------------|--------|-------------|-----------|-------|--------|----------|-------------|
|                    |               |        | Edges       | Apertures | Top   | Bottom | Direct   | Luminescent |
| 5x5 Standard       | 99989         | 4768   | 11068       | 17214     | 3871  | 43276  | 2741     | 17051       |
| 5x5 Full thickness | 999748        | 40616  | 53490       | 145509    | 38922 | 436829 | 48452    | 235932      |
| No channels        | 90847         | 13067  | 5686        | 23190     | 3948  | 44956  | 0        | 0           |
| Grid 2.5 cm        | 10000         | 439    | 5           | 1640      | 405   | 4423   | 304      | 2784        |

| Reactor design | Total photons | Losses | Luminescent |           | Solar |        | Channels |             |
|----------------|---------------|--------|-------------|-----------|-------|--------|----------|-------------|
|                |               |        | Edges       | Apertures | Top   | Bottom | Direct   | Luminescent |
| Grid 5 cm      | 99987         | 5264   | 72          | 18048     | 4054  | 44437  | 1610     | 26502       |
| Grid 10 cm     | 99923         | 6229   | 97          | 19859     | 3953  | 45074  | 791      | 23922       |
| Lines 2.5 cm   | 98578         | 6162   | 1161        | 18407     | 3910  | 44932  | 1519     | 22494       |
| Lines 5 cm     | 98534         | 7052   | 1459        | 19768     | 3855  | 45049  | 793      | 20565       |
| Lines 10 cm    | 98055         | 8147   | 1785        | 21141     | 3956  | 45032  | 404      | 17614       |

1

2 [1] D. Cambié, F. Zhao, V. Hessel, M. G. Debije, T. Noël, *Angew. Chem., Int. Ed.* 2017, 56,

3 1050.
